# Supplementary material for: Genetic Variants in the ABCB1 and ABCG2 Gene Drug Transporters Involved in Gefitinib-Associated Adverse Reaction: A Systematic Review and Meta-Analysis
Source: MDPI journal article supplement (doi:10.3390/genes15050591), 2024-05-07
Supplement: s1 [file s1]

(a)

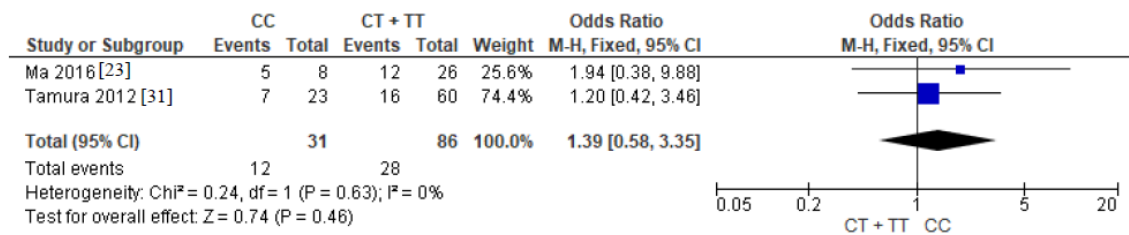

(b)

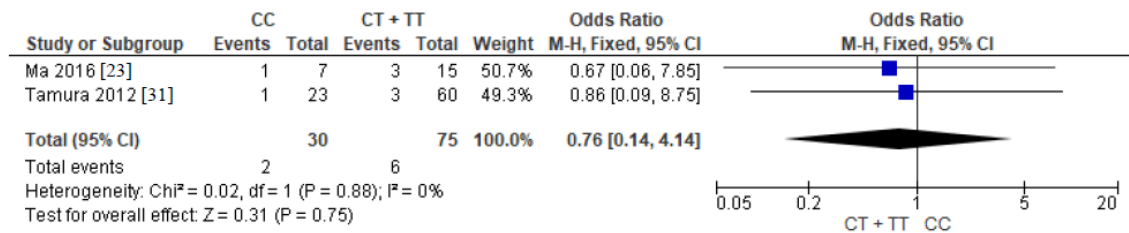

(c)

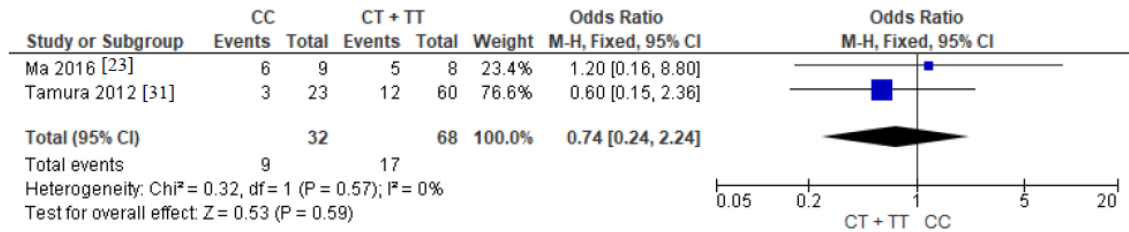

**Figure S1.** Forest plots of association between adenosine triphosphate-binding cassette subfamily B member 1 (*ABCB1*) gene (rs1045642) genetic variant and adverse drug reaction severity (grade 0 versus grade 0 + 1). (a) skin rash (CC versus. CT + TT); (b) diarrhea (CC versus CT + TT); and (c) liver dysfunction (CC versus CT + TT) [ 23,31]. CI, confidence interval; M-H, Mantel-Haenszel;  $I^2$ , heterogeneity;  $\chi^2$ , Chi-square test for heterogeneity.

(a)

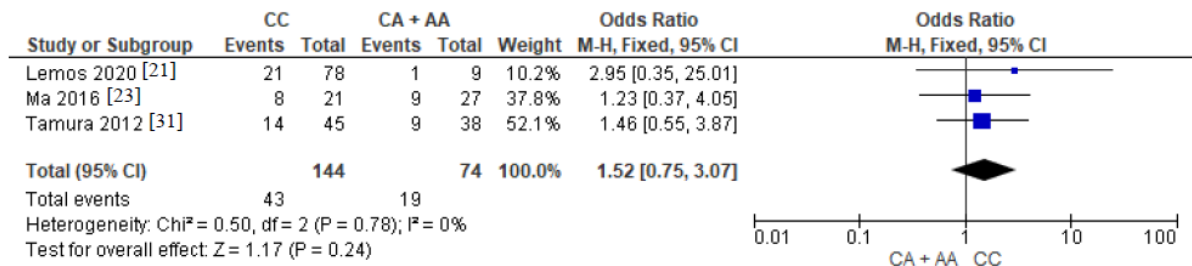

(b)

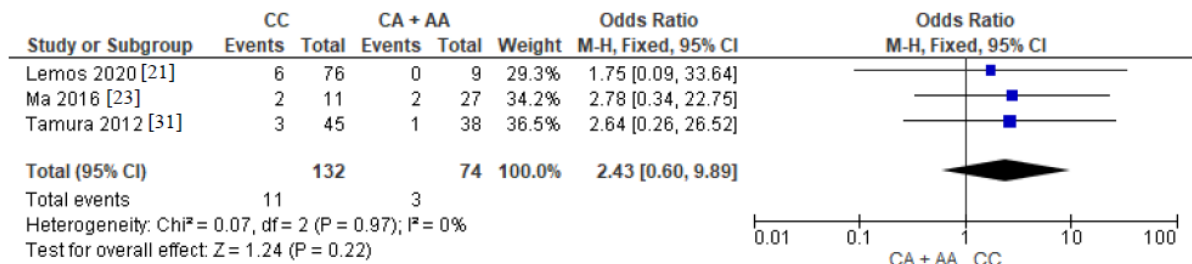

(c)

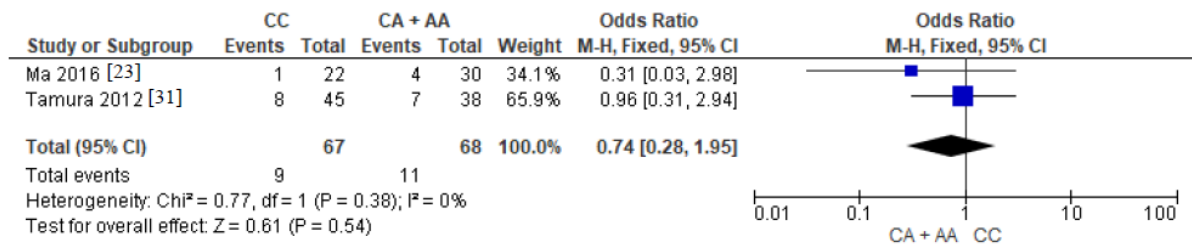

**Figure S2.** Forest association plots between adenosine triphosphate-binding cassette subfamily G member 2 (*ABCG2*) gene (rs2231142) genetic variant and adverse drug reaction severity (grade  $\geq 2$  versus 0 + 1). (a) skin rash (CC versus CA + AA); (b) diarrhea (CC versus CA + AA); and (c) liver dysfunction (CC versus CA + AA) [21,21,31]. CI, confidence interval; M-H, Mantel-Haenszel;  $I^2$ , heterogeneity;  $\text{Chi}^2$ , Chi-square test for heterogeneity.

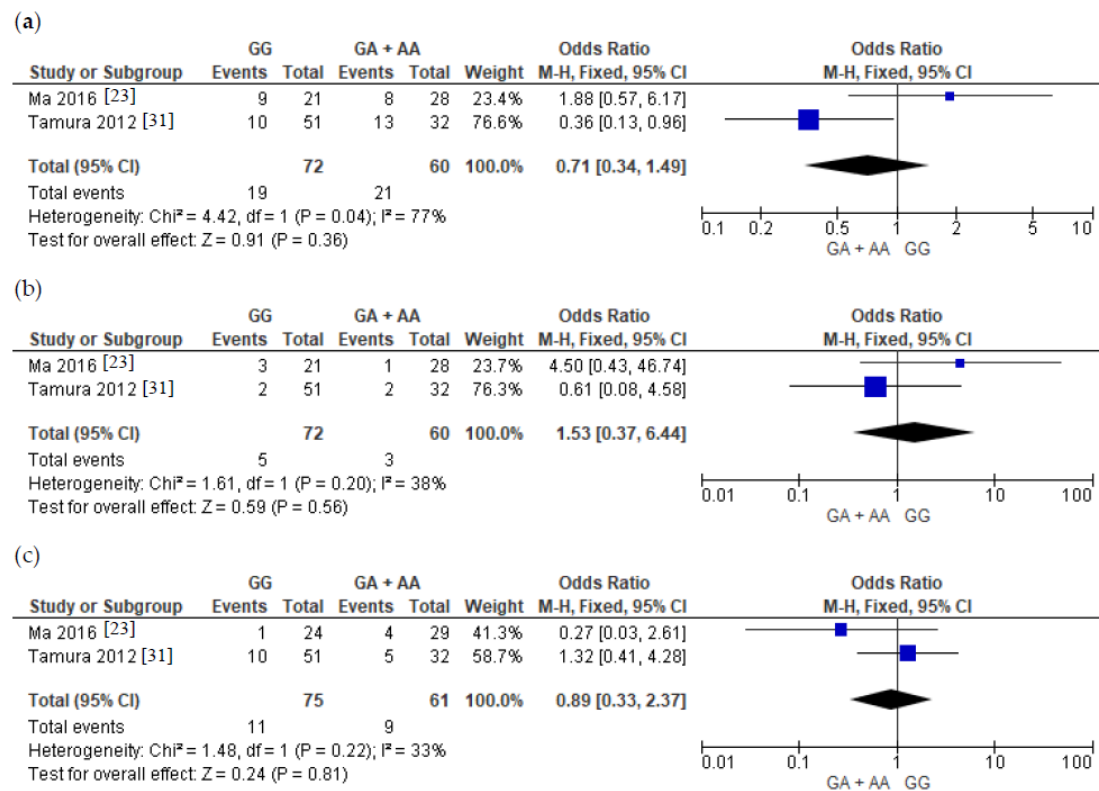

**Figure S3.** Forest association plots between adenosine triphosphate-binding cassette subfamily G member 2 (*ABCG2*) gene (rs2231137) genetic variant and adverse drug reaction severity (grade 1 versus grade  $\geq 2$ ). (a) skin rash (GG versus GA + AA); (b) diarrhea (GG versus GA + AA); and (c) liver dysfunction (GG versus GA + AA) [23,31]. CI, confidence interval; M-H, Mantel-Haenszel;  $I^2$ , heterogeneity;  $\text{Chi}^2$ , Chi-square test for heterogeneity.

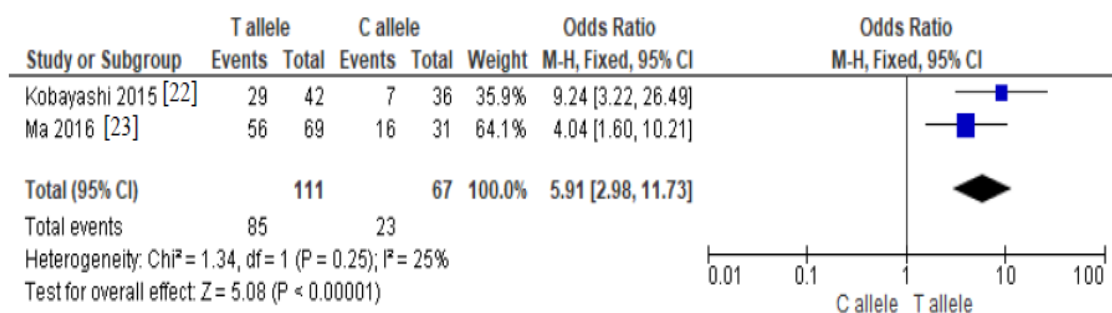

**Figure S4.** Forest plots of association between adenosine triphosphate-binding cassette subfamily B member 1 (*ABCB1*) gene (rs1128503) genetic variant and adverse drug reaction (grade 0 versus grade  $\geq 1$ ). (a) skin rash (T allele versus C allele) [22-23]. CI, confidence interval; M-H, Mantel-Haenszel;  $I^2$ , heterogeneity;  $\text{Chi}^2$ , Chi-square test for heterogeneity.

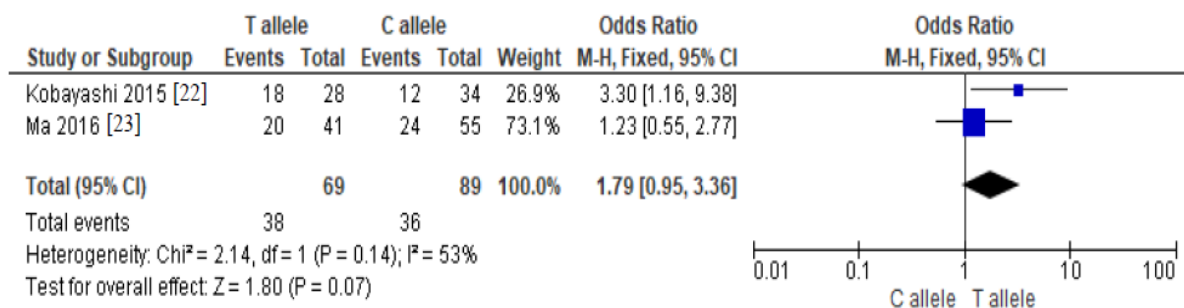

**Figure S5.** Forest plots of association between adenosine triphosphate-binding cassette subfamily B member 1 (*ABCB1*) gene (rs1045642) genetic variant and adverse drug reaction (grade 0 versus grade  $\geq 1$ ) (a) skin rash (T allele versus C allele) [ 22-23]. CI, confidence interval; M-H, Mentel-Haenszel;  $I^2$ , heterogeneity;  $\chi^2$ , Chi-square test for heterogeneity.

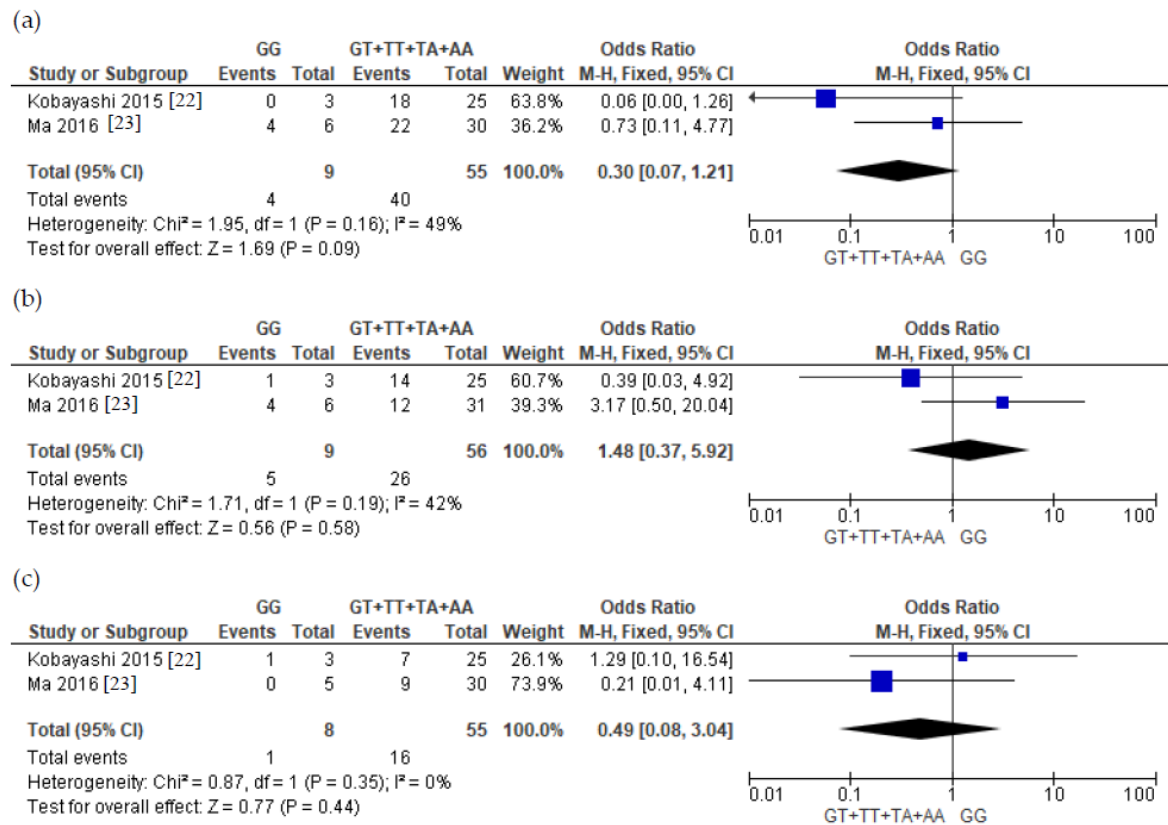

**Figure S6.** Forest plots of association between adenosine triphosphate-binding cassette subfamily B member 1 (*ABCB1*) gene (rs2032582) genetic variant and adverse drug reaction (grade 0 versus grade  $\geq 1$ ). (a) skin rash (GG versus. GT + TT + TA+ AA); (b) diarrhea (GG versus. GT + TT + TA+ AA); and (c) liver dysfunction (GG versus. GT + TT + TA+ AA) [22-23]. CI, confidence interval; M-H, Mantel-Haenszel;  $I^2$ , heterogeneity;  $\chi^2$ , Chi-square test for heterogeneity.

**Table S2.** Excluded Studies

| Absolut Number | Reason for exclusion                        | Authors, year                      | Title                                                                                                                                                                     | Reference |
|----------------|---------------------------------------------|------------------------------------|---------------------------------------------------------------------------------------------------------------------------------------------------------------------------|-----------|
| 1              | Wrong population                            | Wan Z, <i>et al.</i> , 2020        | Determinants of gefitinib pharmacokinetics in healthy Chinese male subjects: A pharmacogenomics study of cytochrome p450 enzymes and transporters                         | [49]      |
| 2              | Wrong, comparator                           | Tiseo M, <i>et al.</i> , 2010.     | Predictors of gefitinib outcomes in advanced non-small cell lung cancer (NSCLC): Study of a comprehensive panel of molecular markers.                                     | [50]      |
| 3              | Wrong comparator                            | Kobayashi H, <i>et al.</i> , 2016. | Effects of polymorphisms in CYP2D6 and ABC transporters and side effects induced by gefitinib on the pharmacokinetics of the gefitinib metabolite, O-desmethyl gefitinib. | [51]      |
| 4              | Wrong comparator.                           | Cho BC <i>et al.</i> , 2019.       | Osimertinib versus standard of care EGFR TKI as first-line treatment in patients with EGFRm advanced NSCLC: FLAURA Asian subset.                                          | [52]      |
| 5              | Wrong comparator.                           | Mou K, <i>et al.</i> , 2016.       | Relationship between miR-7 expression and treatment outcomes with gefitinib in non-small cell lung cancer.                                                                | [53]      |
| 6              | Wrong outcome                               | Ruan Y, <i>et al.</i> , 2016.      | Genetic association of curative and adverse reactions to tyrosine kinase inhibitors in Chinese advanced non-small cell lung cancer patients                               | [54]      |
| 7              | Wrong publication type                      | Akasaka K, <i>et al.</i> , 2010.   | Impact of functional ABCG2 polymorphisms on the adverse effects of gefitinib in Japanese patients with non-small-cell lung cancer                                         | [55]      |
| 8              | Wrong publication type                      | Cusatis G, <i>et al.</i> , 2006.   | Pharmacogenetics of ABCG2 and adverse reactions to gefitinib.                                                                                                             | [46]      |
| 9              | Only abstract.                              | He Y, <i>et al.</i> , 2017.        | Comparing EGFR-TKI with EGFR-TKI plus chemotherapy as 1st line treatment in advanced NSCLC patients with both mutated EGFR and Bim polymorphism                           | [56]      |
| 10             | Only abstract.                              | Jeon EK, <i>et al.</i> , 2010.     | The association between SNP of EGFR and response to EGFR-TKIs according to EGFR mutation in non-small cell lung cancer                                                    | [57]      |
| 11             | Only abstract and metabolizer gene          | Suzumura T, <i>et al.</i> , 2012.  | Reduced CYP2D6 function potentiates the gefitinib-induced rash in patients with non-small cell lung cancer                                                                | [58]      |
| 12             | Only abstract.                              | Xin S, <i>et al.</i> , 2015.       | Correlation of polymorphisms of JAK and STAT with gefitinib-induced hepatotoxicity in patients with non-small cell lung cancer.                                           | [59]      |
| 13             | ABCB1 or ABCB2 gene not involved in outcome | Takimoto T, <i>et al.</i> , 2013   | Polymorphisms of CYP2D6 Gene and Gefitinib-Induced Hepatotoxicity                                                                                                         | [14]      |

|    |                                                                 |                                     |                                                                                                                                                                                    |      |
|----|-----------------------------------------------------------------|-------------------------------------|------------------------------------------------------------------------------------------------------------------------------------------------------------------------------------|------|
| 14 | <i>ABCB1</i> or <i>ABCB2</i><br>gene not involved<br>in outcome | Giovanetti E, <i>et al.</i> , 2010. | Association of polymorphisms in AKT1 and EGFR with clinical outcome and toxicity in non-small cell lung cancer patients treated with gefitinib                                     | [60] |
| 15 | <i>ABCB1</i> or <i>ABCB2</i><br>gene not involved<br>in outcome | Gregorc V, <i>et al.</i> , 2008.    | Germline polymorphisms in EGFR and survival in patients with lung cancer receiving gefitinib                                                                                       | [61] |
| 16 | <i>ABCB1</i> or <i>ABCB2</i><br>gene not involved<br>in outcome | Huang CL, <i>et al.</i> , 2009.     | EGFR intron 1 dinucleotide repeat polymorphism is associated with the occurrence of skin rash with gefitinib treatment                                                             | [62] |
| 17 | <i>ABCB1</i> or <i>ABCB2</i><br>gene not involved<br>in outcome | Sugiyama E, <i>et al.</i> , 2015    | Impact of single nucleotide polymorphisms on severe hepatotoxicity induced by EGFR tyrosine kinase inhibitors in patients with non-small cell lung cancer harboring EGFR mutations | [15] |
| 18 | <i>ABCB1</i> or <i>ABCB2</i><br>gene not involved<br>in outcome | Giovanetti E, <i>et al.</i> , 2011. | Influence of polymorphism on EGFR target therapy in non-small-cell lung cancer                                                                                                     | [63] |
| 19 | <i>ABCB1</i> or <i>ABCB2</i><br>gene not involved<br>in outcome | Xin S, <i>et al.</i> , 2019.        | Polymorphisms of NF-kB pathway gene influence adverse drug reactions of gefitinib in NSCLC patients                                                                                | [64] |
| 20 | <i>ABCB1</i> or <i>ABCB2</i><br>gene not involved<br>in outcome | Liu G, <i>et al.</i> , 2008.        | Epidermal growth factor receptor polymorphisms and clinical outcomes in non-small-cell lung cancer patients treated with gefitinib                                                 | [65] |

**Table S3.** Allelic description for meta-analysis (grades  $\geq 2$  versus grades 0 + 1).

| <i>ABCB1</i> gene - db./ID 1045642 (3435C>T) |                  |         |                 |         |                          |         |
|----------------------------------------------|------------------|---------|-----------------|---------|--------------------------|---------|
| <b>Tamura, et al., 2012 [ 31]</b>            |                  |         |                 |         |                          |         |
| ADRs                                         | <b>Skin Rash</b> |         | <b>Diarrhea</b> |         | <b>Liver Dysfunction</b> |         |
| Alleles                                      | CC               | CC + CT | CC              | CT + TT | CC                       | CT + TT |
| Grade 0 -1                                   | 16               | 44      | 22              | 57      | 20                       | 48      |
| Grade $\geq 2$                               | 7                | 16      | 1               | 3       | 3                        | 12      |
| Total                                        | 23               | 60      | 23              | 60      | 23                       | 60      |
| <b>Ma, et al., 2017 [23]</b>                 |                  |         |                 |         |                          |         |
| ADRs                                         | <b>Skin Rash</b> |         | <b>Diarrhea</b> |         | <b>Liver Dysfunction</b> |         |
| Alleles                                      | CC               | CT + TT | CC              | CT + TT | CC                       | CT + TT |
| Grade 0 -1                                   | 9                | 22      | 13              | 31      | 15                       | 31      |
| Grade $\geq 2$                               | 5                | 12      | 1               | 3       | 1                        | 4       |
| Total                                        | 14               | 34      | 14              | 34      | 16                       | 35      |
| <i>ABCG2</i> gene – db./ID 2231142 (421C>A)  |                  |         |                 |         |                          |         |
| <b>Tamura, et al., 2012 [ 31]</b>            |                  |         |                 |         |                          |         |
| ADRs                                         | <b>Skin Rash</b> |         | <b>Diarrhea</b> |         | <b>Liver Dysfunction</b> |         |
| Alleles                                      | CC               | CA + AA | CC              | CA + AA | CC                       | CA + AA |
| Grade 0 -1                                   | 31               | 29      | 42              | 37      | 37                       | 31      |
| Grade $\geq 2$                               | 14               | 9       | 3               | 1       | 8                        | 7       |
| Total                                        | 45               | 38      | 45              | 38      | 45                       | 38      |
| <b>Ma, et al., 2017 [23]</b>                 |                  |         |                 |         |                          |         |
| ADRs                                         | <b>Skin Rash</b> |         | <b>Diarrhea</b> |         | <b>Liver Dysfunction</b> |         |
| Alleles                                      | CC               | CA + AA | CC              | CA + AA | CC                       | CA + AA |
| Grade 0 -1                                   | 13               | 18      | 9               | 25      | 21                       | 26      |
| Grade $\geq 2$                               | 8                | 9       | 2               | 2       | 1                        | 4       |
| Total                                        | 21               | 27      | 11              | 27      | 22                       | 30      |
| <b>Study Lemos et al., 2020 [21]</b>         |                  |         |                 |         |                          |         |
| ADRs                                         | <b>Skin Rash</b> |         | <b>Diarrhea</b> |         | <b>Liver Dysfunction</b> |         |
| Alleles                                      | CC               | CA + AA | CC              | CA + AA | CC                       | CA + AA |
| Grade 0 -1                                   | 57               | 8       | 70              | 9       | -                        | -       |
| Grade $\geq 2$                               | 21               | 1       | 6               | 0       | -                        | -       |
| Total                                        | 78               | 9       | 76              | 9       | -                        | -       |
| <i>ABCG2</i> gene – db./ID 2231137           |                  |         |                 |         |                          |         |
| <b>Tamura, et al., 2012 [ 31]</b>            |                  |         |                 |         |                          |         |
| ADRs                                         | <b>Skin Rash</b> |         | <b>Diarrhea</b> |         | <b>Liver Dysfunction</b> |         |
| Alleles                                      | GG               | GA + AA | GG              | GA + AA | GG                       | GA + AA |
| Grade 0 -1                                   | 41               | 19      | 49              | 30      | 41                       | 27      |
| Grade $\geq 2$                               | 10               | 13      | 2               | 2       | 10                       | 5       |
| Total                                        | 51               | 32      | 51              | 32      | 51                       | 32      |
| <b>Ma, et al., 2017 [23]</b>                 |                  |         |                 |         |                          |         |
| ADRs                                         | <b>Skin Rash</b> |         | <b>Diarrhea</b> |         | <b>Liver Dysfunction</b> |         |
| Alleles                                      | GG               | GA+AA   | GG              | GA+AA   | GG                       | GA+AA   |
| Grade 0 -1                                   | 12               | 20      | 18              | 27      | 23                       | 25      |
| Grade $\geq 2$                               | 9                | 8       | 3               | 1       | 1                        | 4       |
| Total                                        | 21               | 28      | 21              | 28      | 24                       | 29      |

ADR: adverse drug reaction; *ABCB1*: adenosine triphosphate-binding cassette subfamily B member 1; and *ABCG2*: adenosine triphosphate-binding cassette subfamily G member 2

**Table S4.** Allelic description for meta-analysis (grades 0 versus grades  $\geq 1$ ).

| <i>ABCB1</i> gene - db./ID 1128503 (1236C>T)   |           |         |          |          |         |          |                   |         |          |
|------------------------------------------------|-----------|---------|----------|----------|---------|----------|-------------------|---------|----------|
| <b>Kobayashi <i>et al.</i>, 2015 [22]</b>      |           |         |          |          |         |          |                   |         |          |
| ADRs                                           | Skin Rash |         |          | Diarrhea |         |          | Liver Dysfunction |         |          |
| Alleles                                        | CC        | CT      | TT       | CC       | CT      | TT       | CC                | CT      | TT       |
| Grade 0                                        | 3         | 3       | 4        | 3        | 2       | 8        | 3                 | 3       | 7        |
| Grade $\geq 1$                                 | 1         | 5       | 12       | 1        | 6       | 8        | 1                 | 5       | 9        |
| Total                                          | 4         | 8       | 16       | 4        | 8       | 16       | 4                 | 8       | 16       |
| <b>Ma, <i>et al.</i>, 2017 [23]</b>            |           |         |          |          |         |          |                   |         |          |
| ADRs                                           | Skin Rash |         |          | Diarrhea |         |          | Liver Dysfunction |         |          |
| Alleles                                        | CC        | CT      | TT       | CC       | CT      | TT       | CC                | CT      | TT       |
| Grade 0                                        | 4         | 7       | 3        | 4        | 14      | 9        | 4                 | 20      | 20       |
| Grade $\geq 1$                                 | 2         | 12      | 22       | 2        | 5       | 16       | 3                 | 4       | 4        |
| Total                                          | 6         | 19      | 25       | 6        | 19      | 25       | 6                 | 24      | 24       |
| <i>ABCB1</i> gene - db./ID 1045642 (3435C>T)   |           |         |          |          |         |          |                   |         |          |
| <b>Kobayashi <i>et al.</i>, 2015 [22]</b>      |           |         |          |          |         |          |                   |         |          |
| ADRs                                           | Skin Rash |         |          | Diarrhea |         |          | Liver Dysfunction |         |          |
| Alleles                                        | CC        | CT      | TT       | CC       | CT      | TT       | CC                | CT      | TT       |
| Grade 0                                        | 5         | 4       | 2        | 7        | 8       | 1        | 5                 | 7       | 2        |
| Grade $\geq 1$                                 | 5         | 10      | 5        | 3        | 6       | 6        | 5                 | 7       | 5        |
| Total                                          | 10        | 14      | 7        | 10       | 14      | 7        | 10                | 14      | 7        |
| <b>Ma, <i>et al.</i>, 2017 [23]</b>            |           |         |          |          |         |          |                   |         |          |
| ADRs                                           | Skin Rash |         |          | Diarrhea |         |          | Liver Dysfunction |         |          |
| Alleles                                        | CC        | CT      | TT       | CC       | CT      | TT       | CC                | CT      | TT       |
| Grade 0                                        | 6         | 8       | 0        | 7        | 17      | 2        | 12                | 22      | 6        |
| Grade $\geq 1$                                 | 8         | 19      | 7        | 7        | 10      | 5        | 4                 | 7       | 0        |
| Total                                          | 14        | 27      | 7        | 14       | 27      | 7        | 14                | 29      | 6        |
| <i>ABCB1</i> gene - db./ID 2032582 (2677G>T/A) |           |         |          |          |         |          |                   |         |          |
| <b>Kobayashi <i>et al.</i>, 2015 [22]</b>      |           |         |          |          |         |          |                   |         |          |
| ADRs                                           | Skin Rash |         |          | Diarrhea |         |          | Liver Dysfunction |         |          |
| Alleles                                        | GG        | GT      | TT+TA+AA | GG       | GT      | TT+TA+AA | GG                | GT      | TT+TA+AA |
| Grade 0                                        | 3         | 5       | 2        | 2        | 8       | 3        | 2                 | 6       | 5        |
| Grade $\geq 1$                                 | 0         | 9       | 9        | 1        | 6       | 8        | 1                 | 8       | 6        |
| Total                                          | 3         | 14      | 11       | 3        | 14      | 11       | 3                 | 14      | 11       |
| <b>Ma, <i>et al.</i>, 2017 [23]</b>            |           |         |          |          |         |          |                   |         |          |
| ADRs                                           | Skin Rash |         |          | Diarrhea |         |          | Liver Dysfunction |         |          |
| Alleles                                        | GG        | GT      | TT+TA+AA | GG       | GT      | TT+TA+AA | GG                | GT      | TT+TA+AA |
| Grade 0                                        | 2         | 7       | 1        | 2        | 11      | 8        | 5                 | 16      | 7        |
| Grade $\geq 1$                                 | 4         | 14      | 8        | 4        | 11      | 1        | 0                 | 7       | 2        |
| Total                                          | 6         | 21      | 9        | 6        | 22      | 9        | 5                 | 23      | 9        |
| <i>ABCG2</i> gene - db./ID 2231142 (421C>A)    |           |         |          |          |         |          |                   |         |          |
| <b>Kobayashi <i>et al.</i>, 2015 [22]</b>      |           |         |          |          |         |          |                   |         |          |
| ADRs                                           | Skin Rash |         |          | Diarrhea |         |          | Liver Dysfunction |         |          |
| Alleles                                        | CC        | CA + AA |          | CC       | CA + AA |          | CC                | CA + AA |          |
| Grade 0                                        | 4         | 7       |          | 7        | 9       |          | 8                 | 6       |          |
| Grade $\geq 1$                                 | 12        | 8       |          | 9        | 6       |          | 8                 | 9       |          |
| Total                                          | 16        | 15      |          | 16       | 15      |          | 16                | 15      |          |

---

**Ma, et al., 2017 [23]**

| ADRs           | Skin Rash |         | Diarrhea |         | Liver Dysfunction |         |
|----------------|-----------|---------|----------|---------|-------------------|---------|
| Alleles        | CC        | CA + AA | CC       | CA + AA | CC                | CA + AA |
| Grade 0        | 4         | 9       | 0        | 16      | 20                | 22      |
| Grade $\geq 1$ | 17        | 18      | 11       | 11      | 2                 | 8       |
| Total          | 21        | 27      | 11       | 27      | 22                | 30      |

---

**Lemos et al., 2020 [21]**

| ADRs           | Skin Rash |         | Diarrhea |         | Liver Dysfunction |         |
|----------------|-----------|---------|----------|---------|-------------------|---------|
| Alleles        | CC        | CA + AA | CC       | CA + AA | CC                | CA + AA |
| Grade 0        | 36        | 5       | 45       | 7       | -                 | -       |
| Grade $\geq 1$ | 42        | 4       | 31       | 2       | -                 | -       |
| Total          | 78        | 9       | 76       | 9       | -                 | -       |

---

ADR: adverse drug reaction; *ABCB1*: adenosine triphosphate-binding cassette subfamily B member 1; and

*ABCG2*: adenosine triphosphate-binding cassette subfamily G member 2
